# Supplementary material
Source: PubMed Central journal article supplement (PMC1691316)
Supplement: 12737655s01.pdf [file 12737655s01.pdf]

This is an electronic appendix to the paper by Chat *et al.* 2003 A one-step organelle capture: gynogenetic kiwifruits with paternal chloroplasts. *Proc. R. Soc. Lond. B* 270, 783—789. (DOI 10.1098/rspb.2002.2285.)

Electronic appendices are refereed with the text. However, no attempt has been made to impose a uniform editorial style on the electronic appendices.

### Electronic Appendix A

**Table 2.** Probability to observe the occurrence of four trihaploids of genotype [-] considering syngamy following by random elimination of three sets of chromosomes among the six ones inherited by the zygote ( $2n=6x$ ).

| Locus<br>No. | Name      | No. of<br>paternal-specific<br>alleles<br>per locus (n) | Probability                                                                              |                                                                                                                     |
|--------------|-----------|---------------------------------------------------------|------------------------------------------------------------------------------------------|---------------------------------------------------------------------------------------------------------------------|
|              |           |                                                         | of the trihaploid to be [-] after<br>random elimination<br>of 3 chromosomes ( $Q_{it}$ ) | of one trihaploid to be [-] for all the n paternal-specific<br>alleles at the l locus<br>( $P_{it} \times Q_{it}$ ) |
| 1            | UDK96-001 | 1                                                       | 1                                                                                        | 1/2                                                                                                                 |
|              |           |                                                         | i=0: 1/2<br>i=1: 1/2                                                                     | 1/4                                                                                                                 |
| 2            | UDK96-030 | 3                                                       | 1                                                                                        | 1/20                                                                                                                |
|              |           |                                                         | i=0: 1/20<br>i=1: 9/20<br>i=2: 9/20<br>i=3: 1/20                                         | 9/40<br>36/400<br>1/400                                                                                             |
|              |           |                                                         |                                                                                          | $\sum_{i=0}^{i=n} (P_{it} \times Q_{it}) = 3/4$                                                                     |
| 3            | 721       | 4                                                       | 1/2<br>4/20<br>1/20                                                                      | 1/10<br>12/100<br>1/100                                                                                             |
|              |           |                                                         | i=1: 1/5<br>i=2: 3/5<br>i=3: 1/5                                                         | $\sum_{i=0}^{i=n} (P_{it} \times Q_{it}) = 147/400$                                                                 |
| 4            | 722       | 3                                                       | 1<br>1/2                                                                                 | 1/20<br>9/40                                                                                                        |
|              |           |                                                         | i=0: 1/20<br>i=1: 9/20                                                                   | $\sum_{i=0}^{i=n} (P_{it} \times Q_{it}) = 23/100$                                                                  |

i=2: 9/20  
i=3: 1/20

4/20  
1/20

36/400  
1/400

---

$$\sum_{i=0}^{i=n} (P_{il} \times Q_{il}) = 147 / 400$$

---

Probability for the four trihaploids to be [-] for all the 11 paternal-specific alleles at the four SSR loci examined:  $\left( \prod_{l=1}^{l=4} \sum_{i=0}^{i=n} P_{il} \times Q_{il} \right)^4 = 2.9 \times 10^{-7}$

---
